# Supplementary material for: Histone modifications influence mediator interactions with chromatin
Source: PubMed Central journal article supplement — Nucleic Acids Res. 2011 Jul 8;39(19):8342–54. doi: 10.1093/nar/gkr551 (PMC3201872; doi:10.1093/nar/gkr551), 2011-07-08
Supplement: supp_gkr551_Myers_sup_info_r2.pdf [file supp_gkr551_Myers_sup_info_r2.pdf]

**Supplemental Table 1:** Sequences of synthetic histone tail peptides used in binding experiments

| Name                     | Sequence                                                                                            |
|--------------------------|-----------------------------------------------------------------------------------------------------|
| H2A                      | SGGKGGKAGSAAKASQSRSK-GGK-biotin                                                                     |
| H2AZ                     | SGKAHGGKSGAKDSGLRS-GGK-biotin                                                                       |
| H2B                      | PEPSKSAPAPKKGSKKAITKA-GGK-biotin                                                                    |
| H3                       | ARTKQTARKSTGGKAPRKQLA-GGK-biotin                                                                    |
| Ac-(K9,14)-H3            | ART <sub>[AcK]</sub> QTAR <sub>[AcK]</sub> STGGKAPRKQLA-GGK-biotin                                  |
| Me-(K4)-H3               | ART <sub>[meK]</sub> QTARKSTGGKAPRKQLA-GGK-biotin                                                   |
| Me <sub>3</sub> -(K4)-H3 | ART <sub>[me3K]</sub> QTARKSTGGKAPRKQLA-GGK-biotin                                                  |
| H4                       | SGRGKGGKGLGKGGAKRHRKV-GGK-biotin                                                                    |
| Ac-(K5,8,12,16)-H4       | SGRG <sub>[AcK]</sub> GG <sub>[AcK]</sub> GLG <sub>[AcK]</sub> GGA <sub>[AcK]</sub> RH-GSGSK-biotin |
| Ac-(K5,12)-H4            | SGRG <sub>[AcK]</sub> GGKGLG <sub>[AcK]</sub> GGAKRH-GSGSK-biotin                                   |
| Ac-(K8,16)-H4            | SGRGKGG <sub>[AcK]</sub> GLGKGG <sub>[AcK]</sub> RH-GSGSK-biotin                                    |
| Ac-(K8)-H4               | SGRGKGG <sub>[AcK]</sub> GLGKGGAKRHRC-GSGSK-biotin                                                  |
| Ac-(K12)-H4              | SGRGKGGKGLG <sub>[AcK]</sub> GGAKRHRC-GSGSK-biotin                                                  |
| Ac-(K16)-H4              | SGRGKGGKGLGKGG <sub>[AcK]</sub> RHRC-GSGSK-biotin                                                   |

**Supplementary Information 2** – Amino Acid Sequence of ts mutants aligned to wild type sequence. Locations where a base pair change led to a change in the coding sequence are highlighted in red.

### Med8

|                |                                                               |     |
|----------------|---------------------------------------------------------------|-----|
| <i>med8-39</i> | MSQSTASRVPEGNQGSLOKDVSFDFNGVPGQALDAVRMRLAQLTHSLRRIRDEVSKAGLP  | 60  |
| <i>WT MED8</i> | MSQSTASLVPEGNQGSLOEDVSFDFNGVPGQALDAVRMRLAQLTHSLRRIRDEMСКАELP  | 60  |
| <i>med8-39</i> | QWYTLQSQLNVTLSQLVSVTSTLQHFQETLDSTVVYPLPKFPTTSHESLVATLLRKK SIP | 120 |
| <i>WT MED8</i> | QWYTLQSQLNVTLSQLVSVTSTLQHFQETLDSTVVYPLPKFPTTSHESLVTLLRKK NIP  | 120 |
| <i>med8-39</i> | EVDEWMKYVGGTSGVTTALLKDEEIEMLLQODREITNWARTTYRNEYGERDFKNEESLCE  | 180 |
| <i>WT MED8</i> | EVDEWMKYVRETSVTTALLKDEEIEKLLQODREITNWARTTYRNEYGKHDFKNEESLSE   | 180 |
| <i>med8-39</i> | EHASLLVRDSKPSKPFNVDDVLKSTFTWEKPIITGSTPTSSSN                   | 223 |
| <i>WT MED8</i> | EHASLLVRDSKPSKPFNVDDVLKFTFTGEKPIITGSTSTSSSN                   | 223 |

### Med4

|                |                                                               |     |
|----------------|---------------------------------------------------------------|-----|
| <i>med4-6</i>  | MSVQDTKAVEFSMGHIRSSSVSLVAEATSNTNSEDKLSKVQLYEELWRYEDTLSKLVESV  | 60  |
| <i>WT MED4</i> | MSVQDTKAVEFSMGHIRSSSVSLVAEATSNTNSEDKLSKVQLYEDLCRYEDTLSKLVESV  | 60  |
| <i>mutant</i>  | DRFKPNLDIAKDLIRADEALFENVKLLAEYDNIYRNLOEIDKDSEELDSKTRKILEDPNE  | 120 |
| <i>WT MED4</i> | DRFKPNLDIAKDLIRTDALFENVKLLAEYDNIYRNLOKIDKDSEELDSKTRKILEILNE   | 120 |
| <i>mutant</i>  | CHDGLKALPTLEQVEFEKNAIILQQRSKVNSTELLDYATKLSKFAKIPPTFGKGAVGPNNF | 180 |
| <i>WT MED4</i> | CHDELKALPMLEQVEFEKNTIILQQRSKINSTELLDYATKLSKFTKIPPTFDKGAVGPNNF | 180 |
| <i>mutant</i>  | IWPAEDALRGGMLAMASLHSELTRIPGEEVEETEVPPTVPPSQSEEQKGOMAKKEGTPKT  | 240 |
| <i>WT MED4</i> | IWPAEDALRRGMLAMASLHSELTRIPGEEVEETEVPPTVPPSQSEEQKGOMAKKEGTPKT  | 240 |
| <i>mutant</i>  | DSFIFDGTAKVEGDEADDTKDEEKEENNDALDLDLDFGPDDF                    | 284 |
| <i>WT MED4</i> | DSFIFDGTAKVEGDEADNTKDKEEENNDALDLDLDFDPDDF                     | 284 |

### Med7

|                 |                                                               |     |
|-----------------|---------------------------------------------------------------|-----|
| <i>med7-163</i> | MSNDPGNEVSSLYPPPPPVKFFFTQSNLEKLPKYKEKKAASAKQTAPNNSNGGSEEEITC  | 60  |
| <i>WT MED7</i>  | MSNDPGNEVSSLYPPPPPVKFFFTQSNLEKLPKYKEKKAASAKQTAPNNSNGGSEEEITC  | 60  |
| <i>med7-163</i> | ALDYLTTPPPMPRNQQYRAFGSIRQVKDQLPDLESMLTQLYKKSTENESTNYQCKIQELR  | 12  |
| <i>WT MED7</i>  | ALDYLI PPPMPKNQQYRAFGSIWQVKDQLPDLESMLTQLYKKSTENESTNYQYKIQLR   | 120 |
| <i>med7-163</i> | KLLKSLLLNYLEPIGVSS TNPDMYERKVENIRTI LVDIHLLNEYPHQSRRESLIVLLEE | 1   |
| <i>WT MED7</i>  | KLLKSLLLNYLELIGVLSINPDMYERKVENIRTI L VNIHLLNEYPHQSRRESLIMLLEE | 180 |
| <i>med7-163</i> | QLEYKRGEIREIEQV CERVHGKLT SIQDTLRTGSQSPSSSQ                   | 222 |
| <i>WT MED7</i>  | QLEYKRGEIREIEQVCKQVHDKLT SIQDTLRTGSQSPSSSQ                    | 222 |
